# Supplementary material for: Cystatin C for Risk Stratification in Patients After an Acute Coronary Syndrome
Source: PubMed Central journal article supplement — J Am Heart Assoc. 2018 Oct 12;7(20):e009077. doi: 10.1161/JAHA.118.009077 (PMC6474969; doi:10.1161/jaha.118.009077), 2018-10-12
Supplement: JAH3-7-e009077-s001.pdf [file JAH3-7-e009077-s001.pdf]

# **SUPPLEMENTAL MATERIAL**

**Table S1. Baseline patient characteristics for the biomarker cohort compared to the overall study population in SOLID-TIMI 52.**

| Characteristics                                           | Overall Study Population (N=13,026) |       | Biomarker population (N=4,965) |      |
|-----------------------------------------------------------|-------------------------------------|-------|--------------------------------|------|
|                                                           | Value                               | N     | Value                          | N    |
| Age(yrs) (median, IQR)                                    | 64 (59, 71)                         | 13026 | 64 (59, 71)                    | 4965 |
| Age ≥60 yrs, n (%)                                        | 9661 (74.2%)                        | 13026 | 3699 (74.5%)                   | 4965 |
| Female, n (%)                                             | 3326 (25.5%)                        | 13026 | 1284 (25.9%)                   | 4965 |
| BMI(kg/m <sup>2</sup> ) (median, IQR)                     | 27.6 (24.8, 31.1)                   | 12964 | 27.7 (25.0, 31.2)              | 4951 |
| Current Smoker, n (%)                                     | 2472 (19.0%)                        | 13014 | 916 (18.4%)                    | 4961 |
| <b>Race (pooled)</b>                                      |                                     |       |                                |      |
| White, n (%)                                              | 10921 (83.8%)                       | 13026 | 4364 (87.9%)                   | 4965 |
| Black, n (%)                                              | 315 (2.4%)                          | 13026 | 129 (2.6%)                     | 4965 |
| Asian, n (%)                                              | 1573 (12.1%)                        | 13026 | 394 (7.9%)                     | 4965 |
| Other, n (%)                                              | 217 (1.7%)                          | 13026 | 78 (1.6%)                      | 4965 |
| <b>Region (pooled)</b>                                    |                                     |       |                                |      |
| North America, n (%)                                      | 2806 (21.5%)                        | 13026 | 1129 (22.7%)                   | 4965 |
| South America, n (%)                                      | 955 (7.3%)                          | 13026 | 400 (8.1%)                     | 4965 |
| Western Europe, n (%)                                     | 3688 (28.3%)                        | 13026 | 1491 (30%)                     | 4965 |
| Eastern Europe, n (%)                                     | 3773 (29.0%)                        | 13026 | 1493 (30.1%)                   | 4965 |
| Asia Pacific, n (%)                                       | 1804 (13.8%)                        | 13026 | 452 (9.1%)                     | 4965 |
| Hypertension, n (%)                                       | 9555 (73.4%)                        | 13026 | 3678 (74.1%)                   | 4965 |
| Hyperlipidemia, n (%)                                     | 8356 (64.1%)                        | 13024 | 3255 (65.6%)                   | 4965 |
| Diabetes Mellitus, n (%)                                  | 4502 (34.6%)                        | 13026 | 1673 (33.7%)                   | 4965 |
| Prior MI, n (%)                                           | 4046 (31.1%)                        | 13026 | 1570 (31.6%)                   | 4965 |
| <b>Index Event (Pooled)</b>                               |                                     |       |                                |      |
| STEMI, n (%)                                              | 5883 (45.2%)                        | 13026 | 2251 (45.3%)                   | 4965 |
| NON-STEMI, n (%)                                          | 5559 (42.7%)                        | 13026 | 2117 (42.6%)                   | 4965 |
| Unstable Angina, n (%)                                    | 1584 (12.2%)                        | 13026 | 597 (12%)                      | 4965 |
| ST-Segment Deviation, n (%)                               | 9227 (70.8%)                        | 13019 | 3529 (71.1%)                   | 4963 |
| <b>Activities performed for qualifying event</b>          |                                     |       |                                |      |
| Catheterization, n (%)                                    | 11201 (86.0%)                       | 13025 | 4255 (85.7%)                   | 4965 |
| PCI, n (%)                                                | 9991 (76.7%)                        | 13026 | 3774 (76%)                     | 4965 |
| Fibrinolytic, n (%)                                       | 1203 (9.2%)                         | 13025 | 449 (9%)                       | 4964 |
| Days from qualifying event to randomization (median, IQR) | 14 (6, 23)                          | 13026 | 14 (6, 23)                     | 4965 |
| <b>Baseline measurements</b>                              |                                     |       |                                |      |
| eGFR (ml/min/1.73m <sup>2</sup> ) (median, IQR)           | 78 (66, 90)                         | 12766 | 78 (66, 90)                    | 4872 |
| eGFR<60(mL/min/1.73m <sup>2</sup> ), n (%)                | 1503 (11.54%)                       | 12766 | 593 (11.9%)                    | 4872 |

|                                    |                   |       |              |      |
|------------------------------------|-------------------|-------|--------------|------|
| Creatinine (mg/dL) (median IQR)    | 0.96 (0.81, 1.10) | 12768 | 1 (0.8,1.1)  | 4874 |
| <b>Concomitant medical therapy</b> |                   |       |              |      |
| Aspirin, n (%)                     | 12559 (96.4%)     | 13021 | 4801 (96.7%) | 4965 |
| P2Y12 Inhibitor, n (%)             | 11501 (88.3%)     | 13021 | 4388 (88.4%) | 4965 |
| Statin, n (%)                      | 12317 (94.6%)     | 13021 | 4706 (94.8%) | 4965 |
| Beta Blocker, n (%)                | 11364 (87.2%)     | 13021 | 4365 (87.9%) | 4965 |
| ACE or ARB, n (%)                  | 10755 (82.6%)     | 13021 | 4125 (83.1%) | 4965 |

*IQR: interquartile range, BMI: body mass index, MI, myocardial infarction, PCI: percutaneous coronary intervention, eGFR: estimated glomerular filtration rate, ACE-I: angiotensin-converting enzyme inhibitor, ARB: angiotensin-receptor blocker*

**Table S2. Adjusted risk of outcomes by quartile of cystatin-C after replacing eGFR with creatinine in the main model.**

| Outcome                           | Number of events | HR & 95% CI per 1-SD of log transformed cystatin-C | p-value | Cystatin-C quartile |                     |                     |                     | p-trend |
|-----------------------------------|------------------|----------------------------------------------------|---------|---------------------|---------------------|---------------------|---------------------|---------|
|                                   |                  |                                                    |         | Q1 HR (95%CI)       | Q2 HR (95%CI)       | Q3 HR (95%CI)       | Q4 HR (95%CI)       |         |
| CV Death or HF                    | 347              | 1.30<br>(1.15-1.48)                                | <0.001  | Referent            | 0.84<br>(0.54-1.29) | 1.33<br>(0.90-1.97) | 1.52<br>(1.02-2.27) | <0.01   |
| CV death                          | 206              | 1.18<br>(1.00-1.39)                                | 0.06    | Referent            | 0.84<br>(0.47-1.52) | 1.28<br>(0.75-2.17) | 1.3<br>(0.76-2.25)  | 0.17    |
| Hospitalization for Heart Failure | 186              | 1.55<br>(1.31-1.84)                                | <0.001  | Referent            | 0.85<br>(0.45-1.58) | 1.34<br>(0.76-2.35) | 2.22<br>(1.28-3.83) | <0.01   |
| MACE                              | 651              | 1.16<br>(1.05-1.27)                                | <0.01   | Referent            | 0.95<br>(0.73-1.23) | 1.22<br>(0.95-1.56) | 1.27<br>(0.97-1.66) | 0.03    |
| MI (fatal or non-fatal)           | 406              | 1.18<br>(1.04-1.33)                                | 0.01    | Referent            | 1.15<br>(0.84-1.56) | 1.31<br>(0.97-1.78) | 1.37<br>(0.97-1.92) | 0.05    |
| Stroke (fatal or non-fatal)       | 116              | 0.97<br>(0.77-1.22)                                | 0.80    | Referent            | 0.58<br>(0.30-1.11) | 0.95<br>(0.54-1.68) | 0.99<br>(0.541.80)  | 0.64    |
| All-cause mortality               | 303              | 1.15<br>(1.00-1.32)                                | 0.047   | Referent            | 0.80<br>(0.52-1.23) | 0.96<br>(0.64-1.44) | 1.06<br>(0.70-1.59) | 0.59    |

*Variables included in the model: age (quartiles), sex, BMI (<18.5, 18.5-<25, 25-<30, ≥30), history of heart failure, diabetes mellitus, hypertension, hyperlipidemia, prior MI, current smoker, region (North America and Western Europe vs. other regions), race (white vs. non-white), index diagnosis (STEMI vs. non-STE ACS), catheterization for qualifying event, baseline LDL cholesterol (quartiles), days from qualifying event (≤14 days), randomized treatment arm, baseline Cys-C, baseline creatinine (<1.5 mg/dl), hsTnl (<26mg/dL), BNP (<80 pg.mL), FGF-23 (<93 pg/mL). Of note, collinearity was observed between cystatin C and creatinine when both were combined in the model although the relationship between cystatin-C and CV risk remained significant.*

*CV: cardiovascular, HF: heart failure, MACE: major adverse cardiovascular events, MI: myocardial infarction.*

**Table S3. Adjusted risk of outcomes by quartile of baseline cystatin-C, excluding FGF-23.**

| Outcome                           | HR & 95% CI per 1-SD of log transformed cystatin-C | p-value | Cystatin-C quartile |                     |                     |                     | p-trend |
|-----------------------------------|----------------------------------------------------|---------|---------------------|---------------------|---------------------|---------------------|---------|
|                                   |                                                    |         | Q1 Adj HR (95%CI)   | Q2 Adj HR (95%CI)   | Q3 Adj HR (95%CI)   | Q4 Adj HR (95%CI)   |         |
| CV Death or HF                    | 1.46<br>(1.29-1.65)                                | <0.001  | Referent            | 0.92<br>(0.60-1.42) | 1.48<br>(1.00-2.18) | 2.05<br>(1.38-3.05) | <0.001  |
| CV death                          | 1.43<br>(1.22-1.69)                                | <0.001  | Referent            | 0.92<br>(0.51-1.65) | 1.43<br>(0.85-2.43) | 1.94<br>(1.13-3.32) | <0.01   |
| Hospitalization for Heart Failure | 1.60<br>(1.36-1.90)                                | <0.001  | Referent            | 1.01<br>(0.55-1.86) | 1.51<br>(0.87-2.64) | 2.88<br>(1.67-4.97) | <0.001  |
| MACE                              | 1.22<br>(1.11-1.34)                                | <0.001  | Referent            | 0.99<br>(0.76-1.28) | 1.26<br>(0.98-1.61) | 1.43<br>(1.09-1.88) | <0.01   |
| MI (fatal or non-fatal)           | 1.20<br>(1.06-1.36)                                | <0.01   | Referent            | 1.16<br>(0.85-1.58) | 1.34<br>(0.99-1.81) | 1.45<br>(1.03-2.04) | 0.02    |
| Stroke (fatal or non-fatal)       | 1.05<br>(0.83-1.32)                                | 0.71    | Referent            | 0.64<br>(0.34-1.22) | 1.01<br>(0.57-1.79) | 1.20<br>(0.65-2.20) | 0.31    |
| All-cause mortality               | 1.31<br>(1.14-1.50)                                | <0.001  | Referent            | 0.85<br>(0.55-1.30) | 1.06<br>(0.71-1.59) | 1.41<br>(0.94-2.13) | 0.06    |

*Variables included in the model: age (quartiles), sex, BMI (<18.5, 18.5-<25, 25-<30, ≥30), history of heart failure, diabetes mellitus, hypertension, hyperlipidemia, prior MI, current smoker, region (North America and Western Europe vs. other regions), race (white vs. non-white), index diagnosis (STEMI vs. non-STE ACS), catheterization for qualifying event, baseline LDL cholesterol (quartiles), days from qualifying event (≤14 days), randomized treatment arm, baseline Cys-C, baseline eGFR (<60ml/min/1.73m<sup>2</sup>), hsTnI (<26mg/dL), BNP (<80 pg/mL).*

*CV: cardiovascular, HF: heart failure, MACE: major adverse cardiovascular events, MI: myocardial infarction.*

**Table S4. Reclassification for cardiovascular death or heart failure hospitalization with Cystatin C or eGFR.**

| <b>Model</b>                             | <b>Absolute IDI (95% CI)</b> | <b>p-value</b> | <b>Category-Less NRI (95% CI)</b> | <b>p-value</b> |
|------------------------------------------|------------------------------|----------------|-----------------------------------|----------------|
| Adjusted model* + Cys-C                  | 0.004<br>(0.000-0.007)       | 0.048          | 0.35<br>(0.25, 0.46)              | <0.001         |
| Adjusted model* + eGFR                   | 0.001<br>(-0.002-0.004)      | 0.42           | -0.16<br>(-0.27, -0.054)          | <0.01          |
| Adjusted model* (including eGFR) + Cys-C | 0.003<br>(0.000-0.006)       | 0.07           | 0.28 (0.17, 0.39)                 | <0.001         |

*\*Variables included in the model: age (quartiles), sex, BMI (<18.5, 18.5-<25, 25-<30, ≥30), history of heart failure, diabetes mellitus, hypertension, hyperlipidemia, prior MI, current smoker, region (North America and Western Europe vs. other regions), race (white vs. non-white), index diagnosis (STEMI vs. non-STE ACS), catheterization for qualifying event, baseline LDL cholesterol (quartiles), days from qualifying event (≤14 days), randomized treatment arm, hsTnl (<26mg/dL), BNP (<80 pg.mL), FGF-23 (<93 pg/mL).*
